# Supplementary material for: Genome-wide CRISPR screen identifies protein pathways modulating tau protein levels in neurons
Source: PubMed Central journal article supplement (PMC8203616; doi:10.1038/s42003-021-02272-1), 2021-06-14
Supplement: 42003_2021_2272_MOESM3_ESM.pdf [file 42003_2021_2272_MOESM3_ESM.pdf]

## **Description of Additional Supplementary Files**

**File name:** Supplementary Data 1

**Description:** Unsorted Raw Analysis

**File name:** Supplementary Data 2

**Description:** Whole Genome Screen Results

**File name:** Supplementary Data 3

**Description:** Mini-Pool Validation Screen Results

**File name:** Supplementary Data 4

**Description:** STRING Enrichment Down Regulators

**File name:** Supplementary Data 5

**Description:** STRING Enrichment Up Regulators

**File name:** Supplementary Data 6

**Description:** iNgn2 screened genes

**File name:** Supplementary Data 7

**Description:** Whole Genome NGS Raw Count Data

**File name:** Supplementary Data 8

**Description:** Mini-Pool NGS Raw Count Data

**File name:** Supplementary Data 9

**Description:** Source data for plots shown in main Figures.
